# Supplementary material for: Rovibrational spectroscopic constants of the interaction between ammonia and metallo-phthalocyanines: a theoretical protocol for ammonia sensor design
Source: Royal Society of Chemistry journal article supplement (doi:10.1039/c6cp07900h), 2017-01-01
Supplement: c6cp07900h1.pdf [file c6cp07900h1.pdf]

### Supporting Information for

## Ammonia Sensor Design from Interaction with Metallo-Phthalocyanines: DFT Analysis of Rovibrational and Thermodynamics Parameters

Alan. R. Baggio,<sup>a,c</sup> Daniel. F. S. Machado,<sup>a</sup> Valter H. C. Silva,<sup>b</sup> Leonardo G. Paterno<sup>c</sup> and Heibbe C. B. de Oliveira<sup>a</sup>

---

<sup>a</sup> *Institute of Chemistry, Laboratório de Estrutura Eletrônica e Dinâmica Molecular (LEEDMOL), University of Brasília, Campus Darcy Ribeiro, Brasília, Brazil.*

---

<sup>b</sup> *Grupo de Química Teórica e Estrutural de Anápolis, Campus de Ciências Exatas e Tecnológicas. Universidade Estadual de Goiás, CP 459, 75001-970 Anápolis, GO Brazil.*

---

<sup>c</sup> *Institute of Chemistry, Laboratório de Pesquisa em Polímeros, University of Brasília, Campus Darcy Ribeiro, Brasília, Brazil.*

Email: heibbe@unb.br/ heibbe@outlook.com

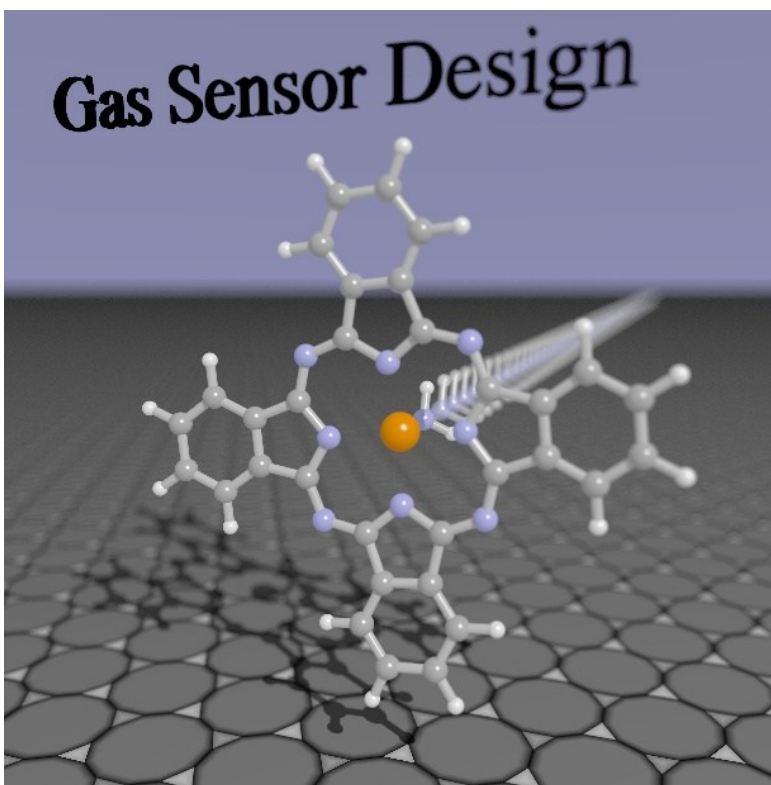

Table of Contents Graphics.

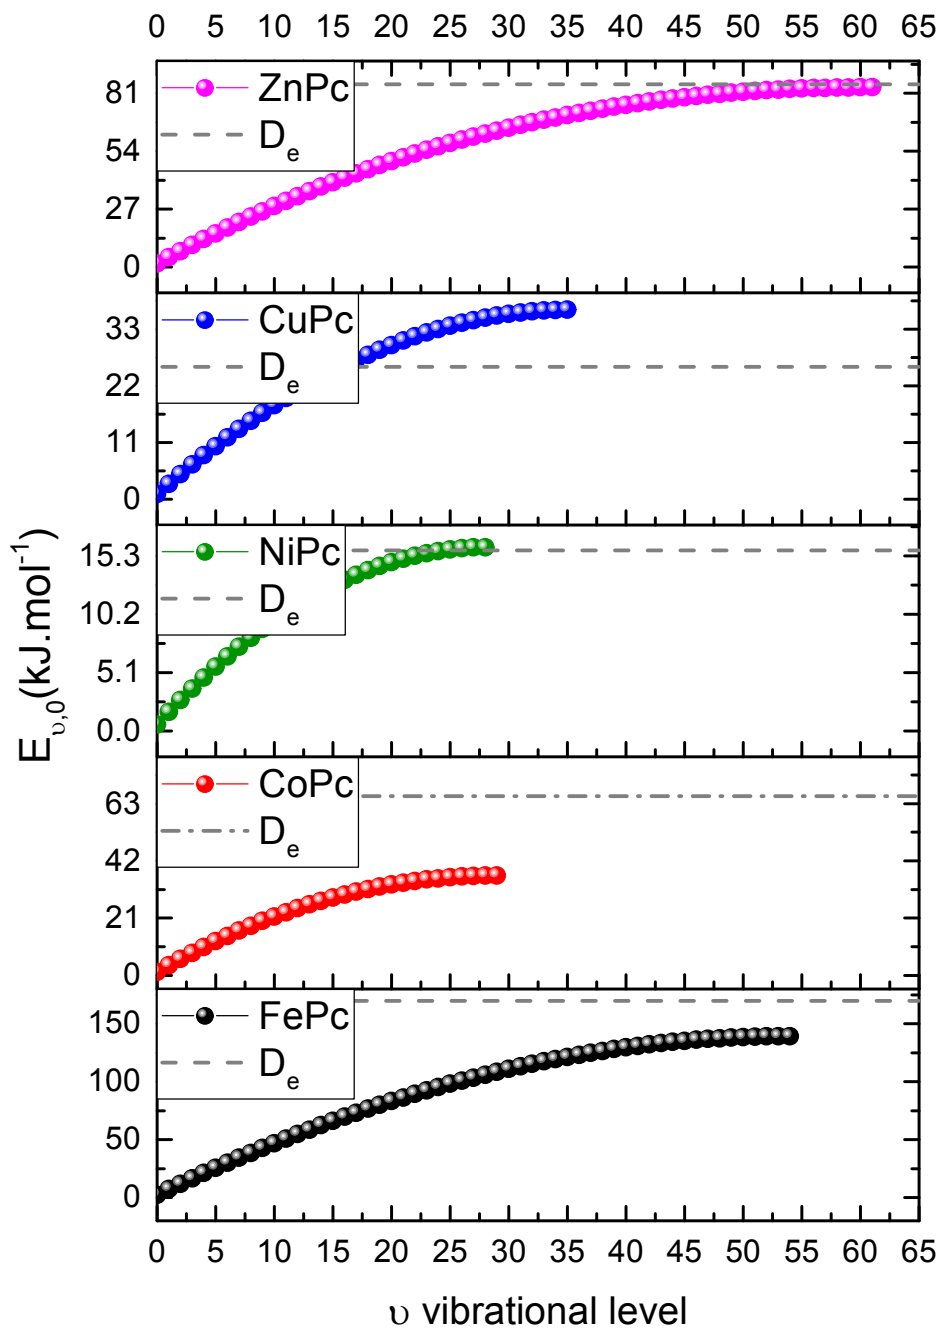

Figure S1. Maximum vibrational number ( $v_{max}$ ) obtained from the B3LYP/6-311G(d)/LANL2DZ BECs according to protocol C.  $D_e$  was obtained from the difference between the geometry in equilibrium and in the asymptotic region.

Table S1. Fitted Rydberg of sixth degree parameters for MPC-NH3 BECs obtained from B3LYP/6-311G(d)/LANL2DZ without corrections.

| System | $c_1$    | $c_2$     | $c_3$    | $c_4$     | $c_5$    | $c_6$     | $R_e$ (bohr) | $D_e$ (hartree) | $\chi^2$ ( $10^{-9}$ ) (hartree) |
|--------|----------|-----------|----------|-----------|----------|-----------|--------------|-----------------|----------------------------------|
| FePc   | 1.015707 | -0.290585 | 0.103751 | -0.019521 | 0.006461 | -0.000522 | 3.78         | 0.060010        | 8.2                              |
| CoPc   | 1.17530  | -0.04033  | 0.09761  | 0.00379   | 0.00788  | 0.00001   | 4.29         | 0.02201         | 0.81                             |
| NiPc   | 0.776410 | -0.072623 | 0.175097 | -0.023183 | 0.000610 | 0.000000  | 5.34         | 0.004790        | 0.092                            |
| CuPc   | 0.529297 | -0.560815 | 0.256448 | -0.048415 | 0.003958 | -0.000119 | 4.62         | 0.012187        | 27                               |
| ZnPc   | 0.755789 | -0.445929 | 0.261737 | -0.069954 | 0.009232 | -0.000465 | 4.18         | 0.030980        | 190                              |

Table S2. Fitted Rydberg of sixth degree parameters for MPC-NH3 BECs obtained from B3LYP/6-311G(d)/LANL2DZ including BSSE corrections.

| System | $c_1$    | $c_2$     | $c_3$     | $c_4$     | $c_5$    | $c_6$     | $R_e$ (bohr) | $D_e$ (hartree) | $\chi^2$ ( $10^{-9}$ ) (hartree) |
|--------|----------|-----------|-----------|-----------|----------|-----------|--------------|-----------------|----------------------------------|
| FePc   | 1.361873 | 0.029271  | 0.044745  | 0.007133  | 0.006071 | -0.000244 | 3.79         | 0.05256         | 0.39                             |
| CoPc   | 1.12809  | -0.25914  | 0.12665   | -0.01226  | 0.00375  | -0.00033  | 4.3          | 0.0153          | 6.7                              |
| NiPc   | 0.624951 | 0.023064  | -0.016486 | -0.079889 | 0.03167  | -0.003339 | 6.61         | 0.000396        | 1.7                              |
| CuPc   | 1.200324 | -0.070811 | 0.097429  | -0.000222 | 0.008476 | -0.001711 | 4.76         | 0.00675         | 1.7                              |
| ZnPc   | 1.165452 | -0.064404 | 0.073175  | -0.020727 | 0.008914 | -0.001828 | 4.28         | 0.2339          | 1.2                              |

Table S3. Fitted Rydberg of sixth degree parameters for MPC-NH3 BECs obtained from B3LYP/6-311G(d)/LANL2DZ including BSSE and dispersion corrections.

| System | $c_1$   | $c_2$   | $c_3$   | $c_4$    | $c_5$    | $c_6$      | $R_e$ (bohr) | $D_e$ (hartree) | $\chi^2$ ( $10^{-9}$ ) (hartree) |
|--------|---------|---------|---------|----------|----------|------------|--------------|-----------------|----------------------------------|
| FePc   | 1.26311 | 0.00290 | 0.07000 | 0.00303  | 0.00351  | 9.64375E-6 | 3.76         | 0.06462         | 0.71                             |
| CoPc   | 1.32582 | 0.15889 | 0.11552 | 0.01156  | 0.00204  | 6.25266E-4 | 4.24         | 0.02502         | 0.43                             |
| NiPc   | 2.10717 | 1.75478 | 0.71708 | 0.18422  | 0.13353  | 0.05605    | 5.40         | 0.00601         | 2.12                             |
| CuPc   | 1.92256 | 0.94297 | 0.20126 | -0.07478 | -0.03359 | 0.01693    | 4.59         | 0.00979         | 1.19                             |
| ZnPc   | 1.24593 | 0.15897 | 0.10305 | -0.00579 | 0.00555  | 1.74872E-5 | 4.23         | 0.03239         | 0.18                             |

Table S4. Thermodynamic quantities for the MPC-NH<sub>3</sub> interaction calculated from rovibrational constants obtained utilizing BSSE and GD3BJ corrections (Protocol C).

| T = 298K                     | FePc    | CoPc   | NiPc   | CuPc   | ZnPc   |
|------------------------------|---------|--------|--------|--------|--------|
| $\Delta G$ ( $kJ.mol^{-1}$ ) | -150.06 | -48.76 | -3.39  | -9.84  | -67.52 |
| $\Delta H$ ( $kJ.mol^{-1}$ ) | -172.61 | -69.04 | -18.49 | -29.10 | -88.41 |
| $\Delta S$ ( $J.mol^{-1}$ )  | -75.627 | -68.02 | -50.65 | -64.61 | -70.08 |

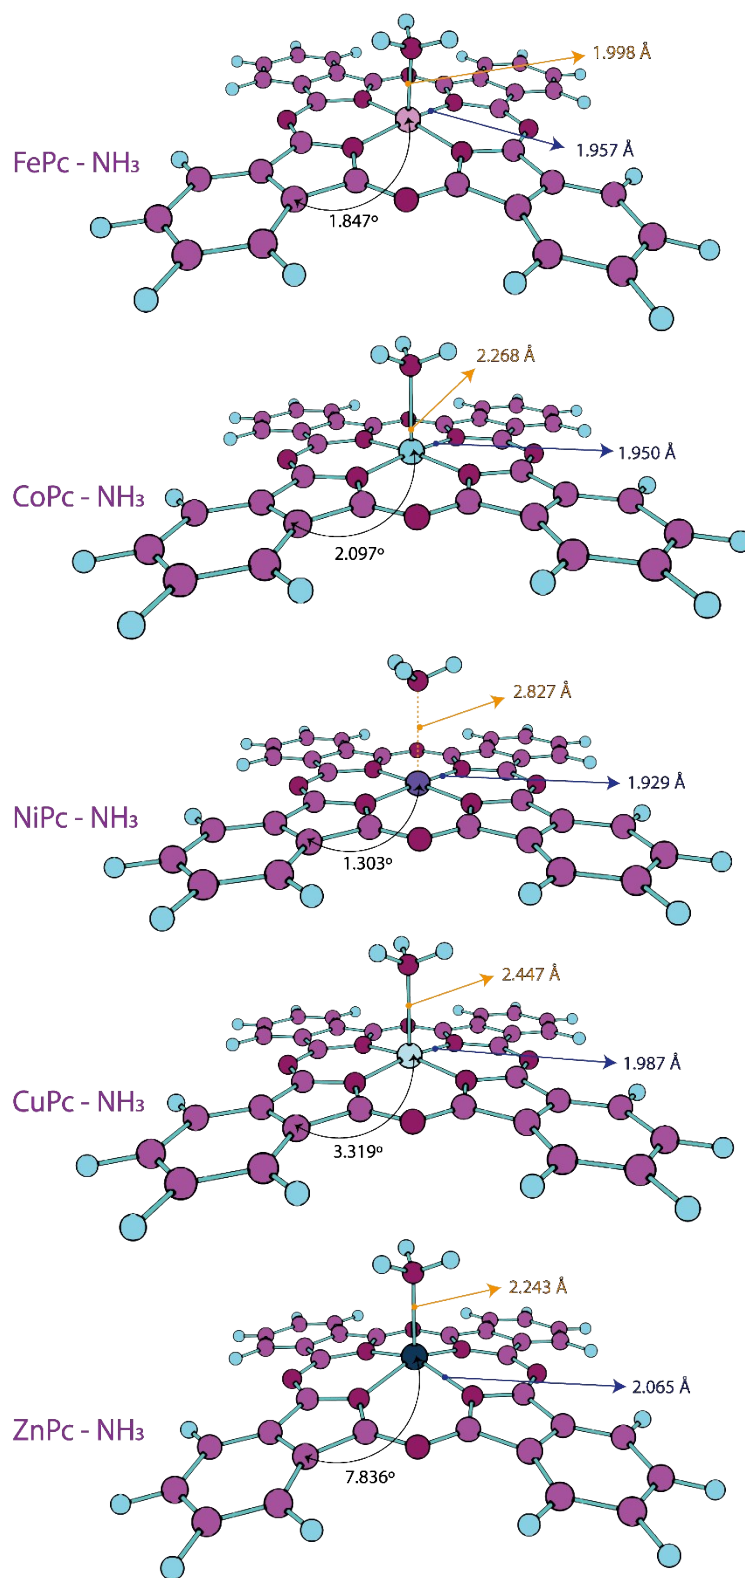

Figure S2. Optimized geometries for MPC-NH<sub>3</sub> interaction obtained via B3LYP/6-311G(d)/LANL2DZ level of theory (protocol C).

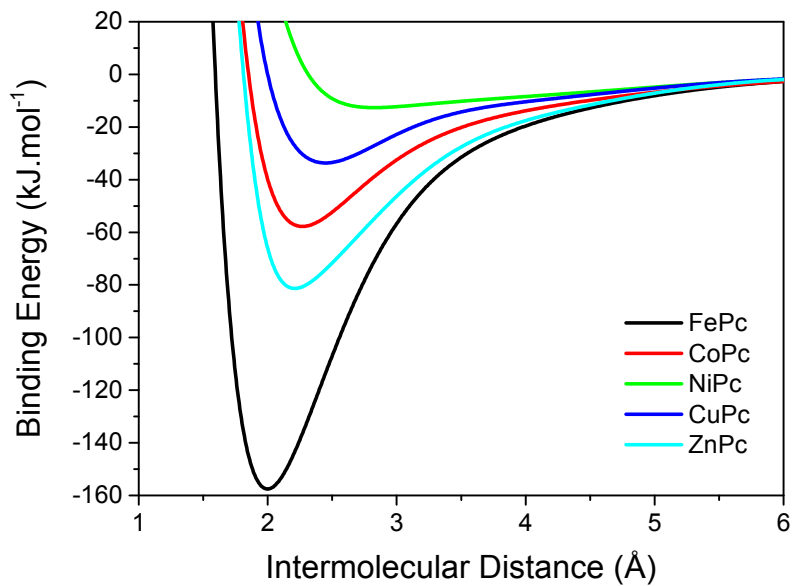

Figure S3. BECs for the MPC-NH<sub>3</sub> interaction without corrections (protocol A).

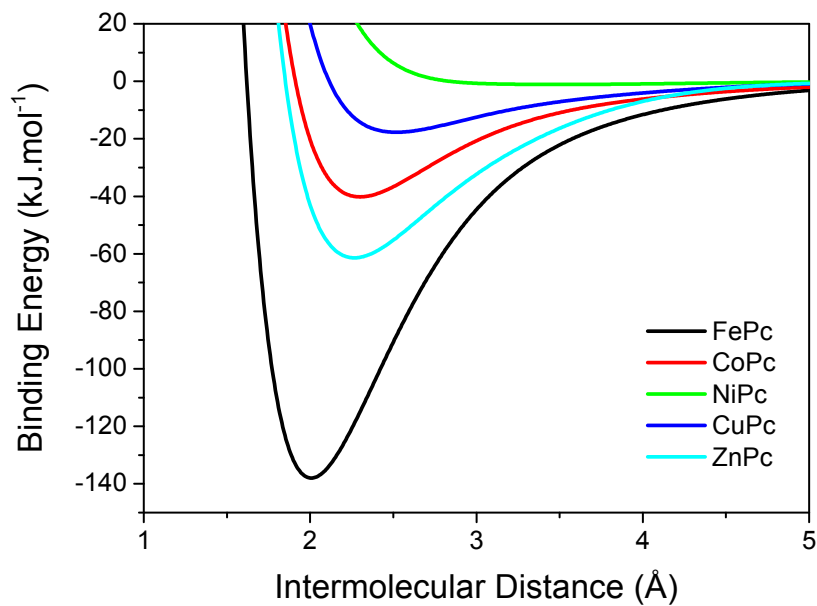

Figure S4. BECs for the MPC-NH<sub>3</sub> interaction with BSSE corrections (protocol B).

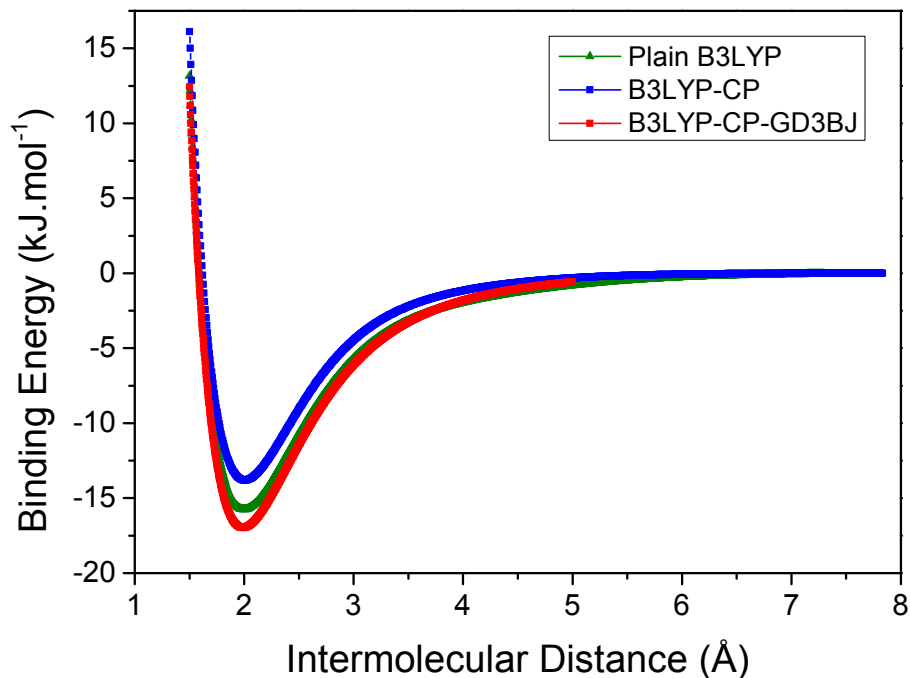

Figure S5. FePc-NH<sub>3</sub> BECs for plain B3LYP/6-311G(d)/LANL2DZ calculation (green), including only BSSE corrections (blue) and including both of BSSE and Dispersive corrections (red).

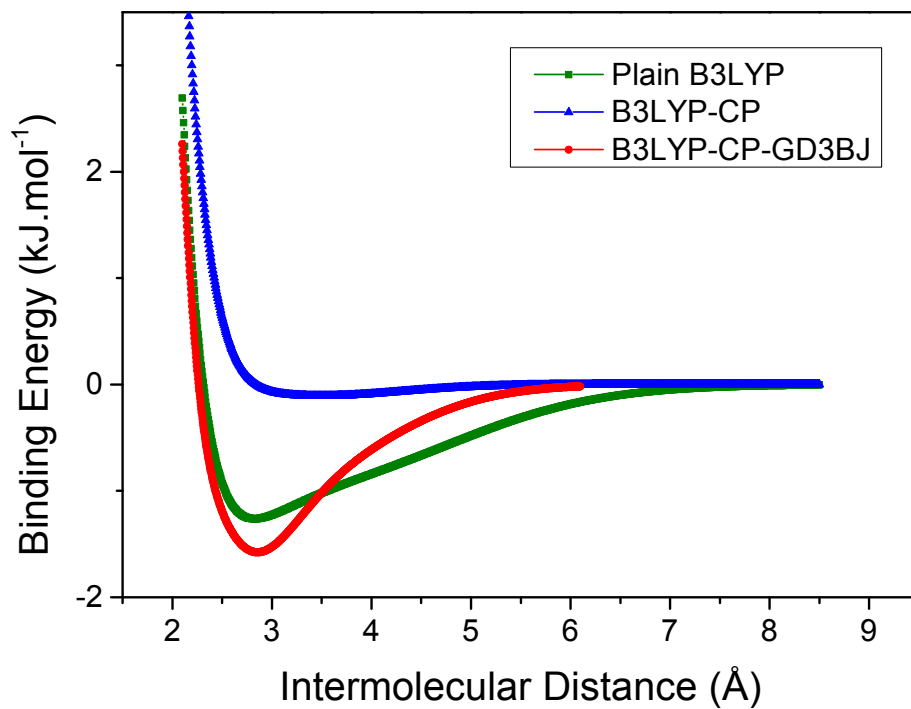

Figure S6. NiPc-NH<sub>3</sub> BECs for plain B3LYP/6-311G(d)/LANL2DZ calculation (green), including only BSSE corrections (blue) and including both of BSSE and dispersive corrections (red).
